# Supplementary material for: Graph representation of high-dimensional alpha-helical membrane protein data
Source: Springer Nature journal article supplement (doi:10.1186/1756-0381-6-21), 2013-12-01

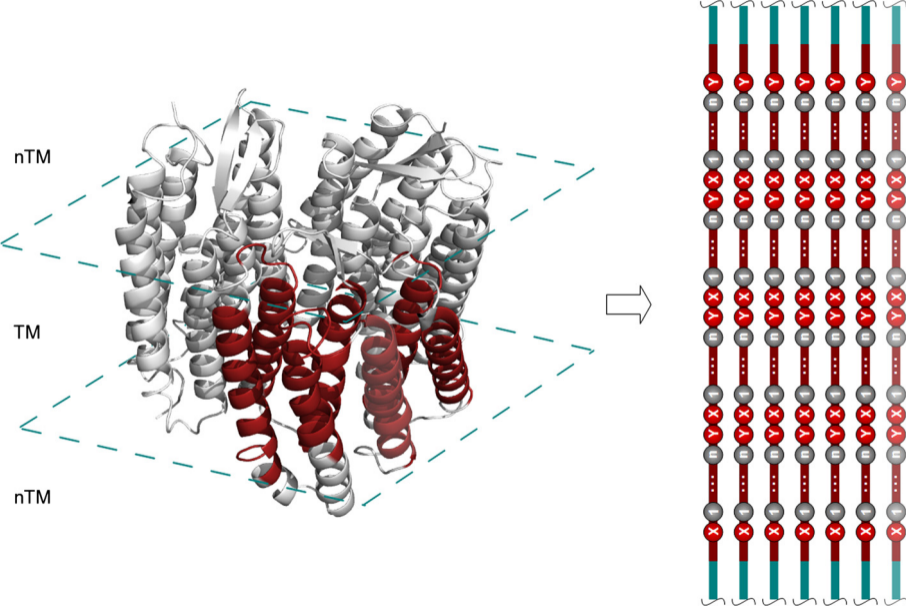

Supplement: 13040_2013_100_MOESM3_ESM.pdf [file 13040_2013_100_MOESM3_ESM.pdf]
