# Supplementary material for: Graph representation of high-dimensional alpha-helical membrane protein data
Source: Springer Nature journal article supplement (doi:10.1186/1756-0381-6-21), 2013-12-01
Supplement: 13040_2013_100_MOESM4_ESM.pdf [file 13040_2013_100_MOESM4_ESM.pdf]

**Algorithm** create\_TM\_SubGraph(possible\_TM\_Motifs, aS) :

*Input:* possible\_TM\_Motifs as list consisting of all possible 'TM' motifs,  
aS declares the size of a motif-architecture / number of immediately consecutive motifs

*Output:* Graph

**SET** Graph;

**for** all elements in possible\_TM\_Motifs **do**

Recursive analysing of immediately consecutive motifs by updating composite pattern.  
Traversing and returning all possible paths with size of motif-architecture == aS;

**for** all possible paths as representable motif-architecture **do**

Insert or update each motif as node out of the current motif-architecture in Graph

Update edges weightiness possibly
